# Supplementary material
Source: PubMed Central journal article supplement (PMC3372382)

Supplemental Materials to

ATM-dependent phosphorylation of the  
checkpoint clamp regulates repair pathways and  
maintains genomic stability

Min Hwa Shin<sup>1</sup>, Ming Yuan<sup>1</sup>, Hao Zhang<sup>2</sup>, Joseph B. Margolick<sup>2</sup>  
and Mihoko Kai<sup>1\*</sup>

## SUPPLEMENTAL FIGURE LEGENDS

**Figure SI1. Knockdown of endogenous Rad9 and ATM.** (a) Flag-tagged wild type Rad9 and Rad9-S272C mutant proteins were expressed exogenously, and endogenous Rad9 expression was knocked down by its shRNA on the 3'UTR resign. (b) ATM knockdown by two independent ATM specific siRNAs. Five nM siRNAs were used for knockdown.

**Figure SI2. Knockdown of ATR and DNAPKc do not affect Rad9-S272 phosphorylation.** (a) ATR knockdown by two independent ATR specific siRNAs (1 & 2) (top panel), Rad9-S272 phosphorylation is not affected by ATR knockdown (bottom panel). (b) DNA-PKc knockdown by two independent DNA-PKc specific siRNAs (1 & 2) (top panel), Rad9-S272 phosphorylation is not affected by DNA-PKc knockdown (bottom panel). NC: negative control siRNA,

**Figure SI3. Nuclear localization and damage-induced foci formation of Rad9 do not require ATM.** Localization and foci formation of Rad9 protein was checked by anti-Rad9 antibody in ATM knockdown cells with and without IR treatment (3 Gy). Two independent ATM specific siRNAs were used (5 nM).

**Figure SI4. Rad9<sup>Ser272</sup> phosphorylation is not required for Chk1 and Chk2 phosphorylation.** (a) Chk1<sup>Ser345</sup> phosphorylation after damage is normal in the Rad9-S272C cells. (b) Chk2<sup>Thr68</sup> phosphorylation after damage is normal in the Rad9-S272C cells.

**Figure SI5. The Rad9-S272C mutant cells show intact DNA damage response.** The Rad9-S272C mutant is not sensitive to DNA damage caused by IR, CPT, UV and HU. (a) Proliferation assay. Cells were incubated with indicated amount of CPT and HU for 6 hours, or irradiated at indicated dose of IR and UV. After 1 hour, the proliferation assay was performed. (b) Colony formation assay.

Cells were treated with 300 nM CPT (6 hours) and 100  $\mu$ M HU (1 hour), 2 Gy IR or 4 J/m<sup>2</sup> UV irradiation. After 2 weeks, numbers of colonies were counted.

**Figure SI6.  $\gamma$ -H2AX foci are detected in Rad9-S272C and Rad9-S272A mutant cells during S phase.** G1, S and G2/M phase cells were stained with anti- $\gamma$ -H2AX antibody.

**Figure SI7. Rad9<sup>Ser272</sup> is phosphorylated during normal cell cycle in an ATM dependent manner.** (a) Cell cycle progression and Rad9<sup>Ser272</sup> phosphorylation in sorted cells with (bottom, left) and without KU55933 treatment (top, left). Cell cycle progression and Rad9<sup>Ser272</sup> phosphorylation in sorted cells with siATM (bottom, right) and with control siRNA (top, right). (b) Cell cycle progression and Rad9<sup>S272</sup> phosphorylation in sorted DLD1 (control) and ATR-Seckel cells.

**Figure SI8. MRE11 is required for Rad9-S272 phosphorylation during S to G2 phase.** MRE11, Rad50 and Nbs1 knockdown (5 nM) (top panels), Rad9-S272 phosphorylation in control and MRE11 specific siRNA knockdown cells (bottom panel).

**Figure SI9. Rad9<sup>Ser272</sup> is phosphorylated during unperturbed cell cycle in primary cells.** Cell cycle progression (left) and Rad9<sup>Ser272</sup> phosphorylation (right) in sorted MRC5 cells.

**Figure SI10. Phosphorylation of ATM substrates is normal in the Rad9-S272C mutant cells.** Cell cycle progression and ATM substrate-phosphorylation in sorted Rad9 and Rad9-S272C cells.

a

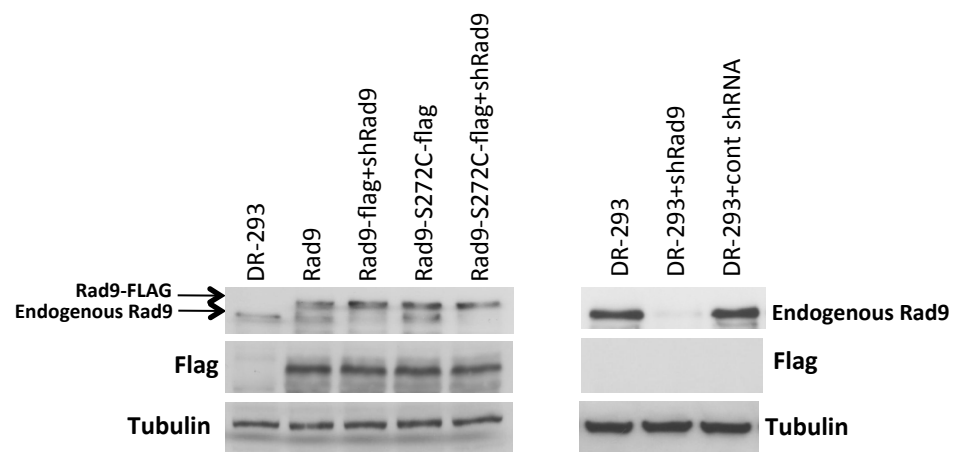

b

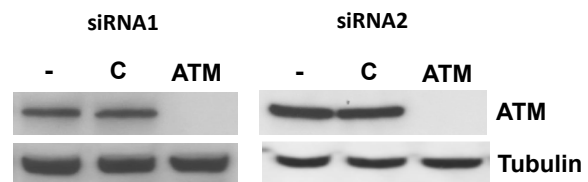

a

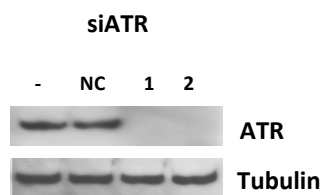

b

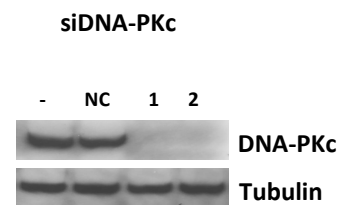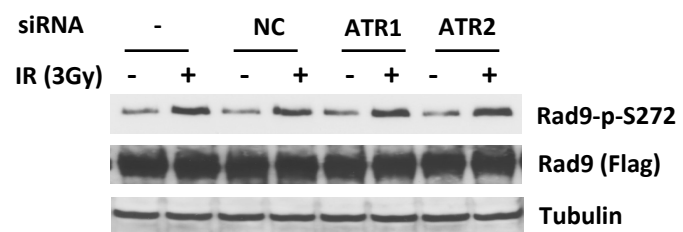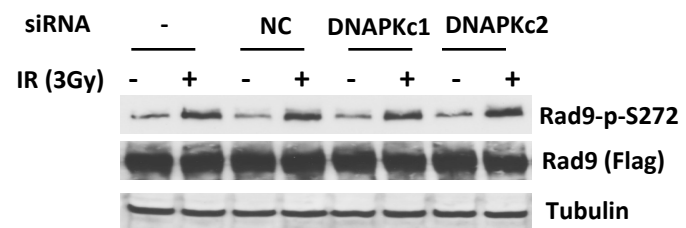

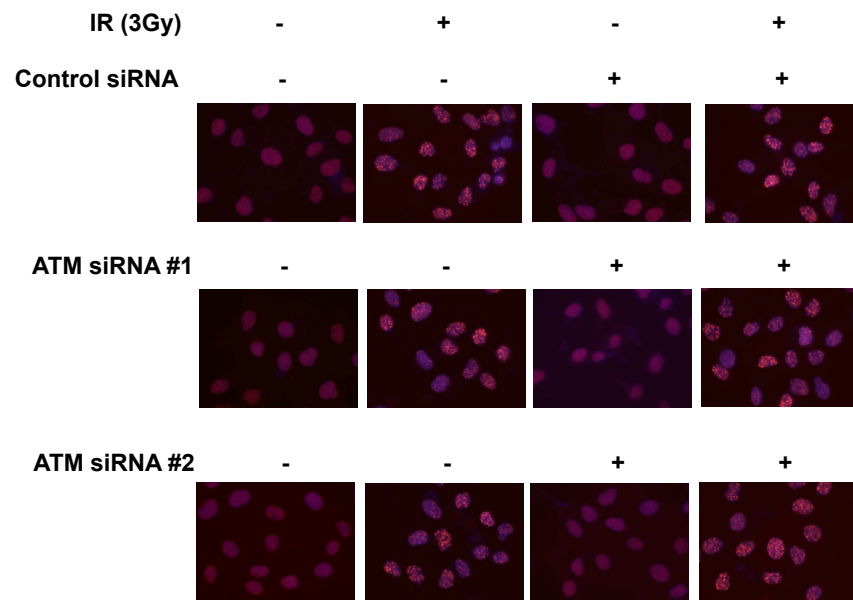

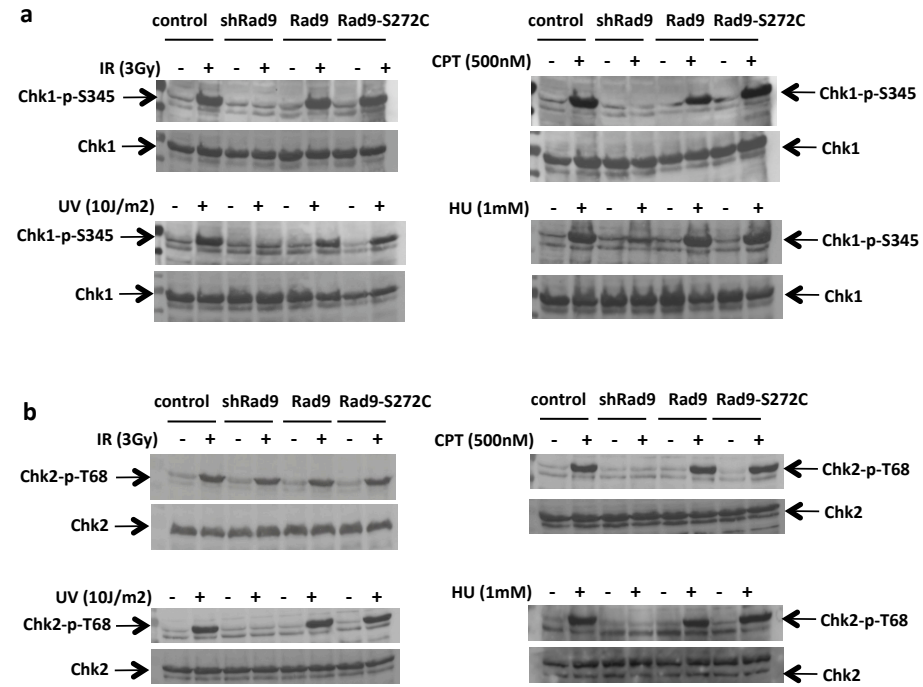

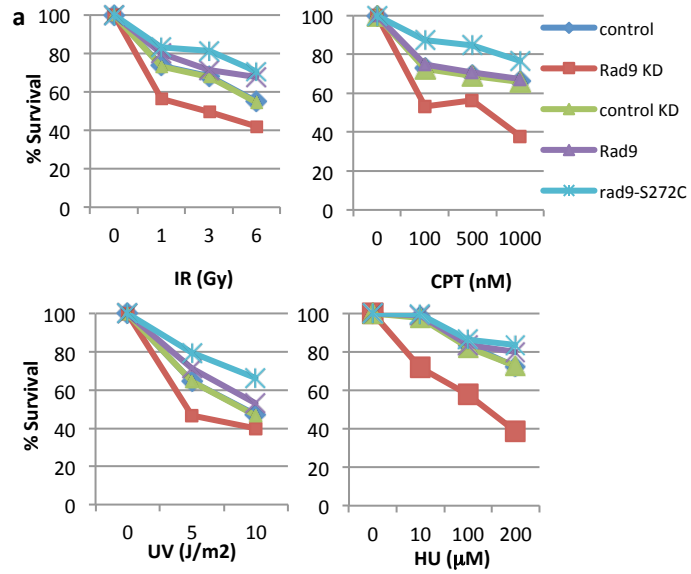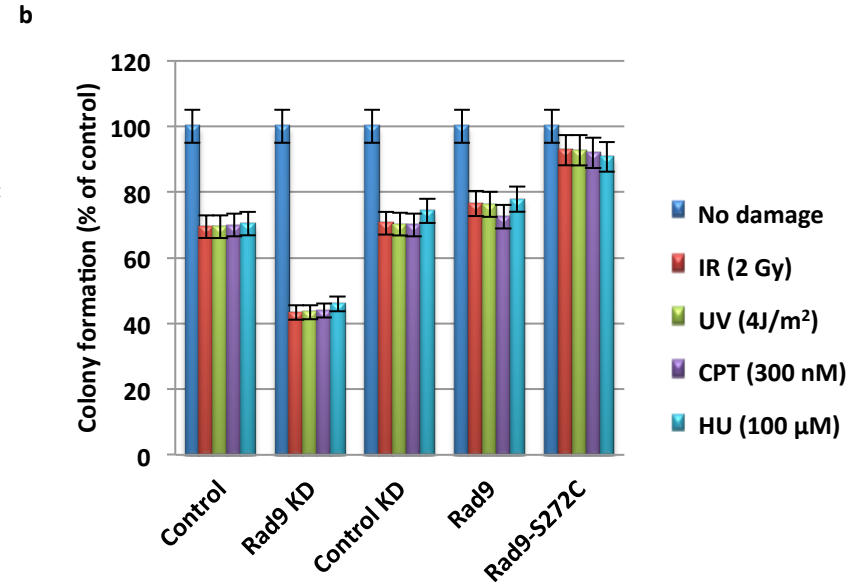



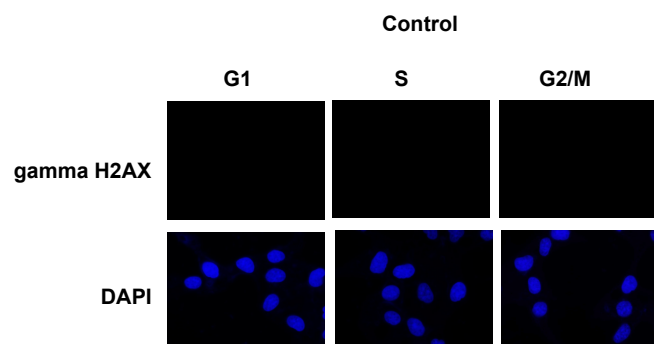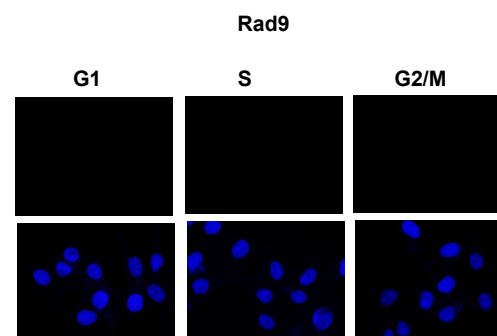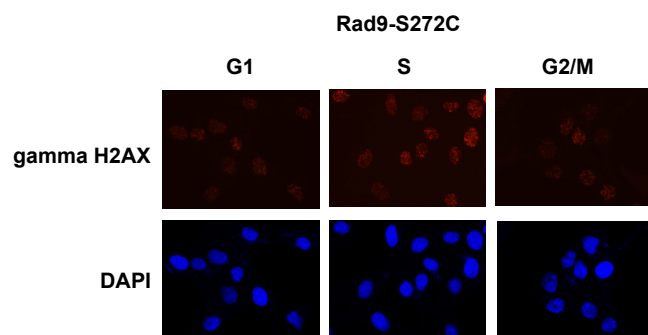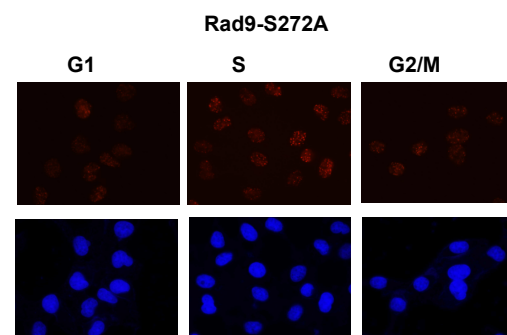

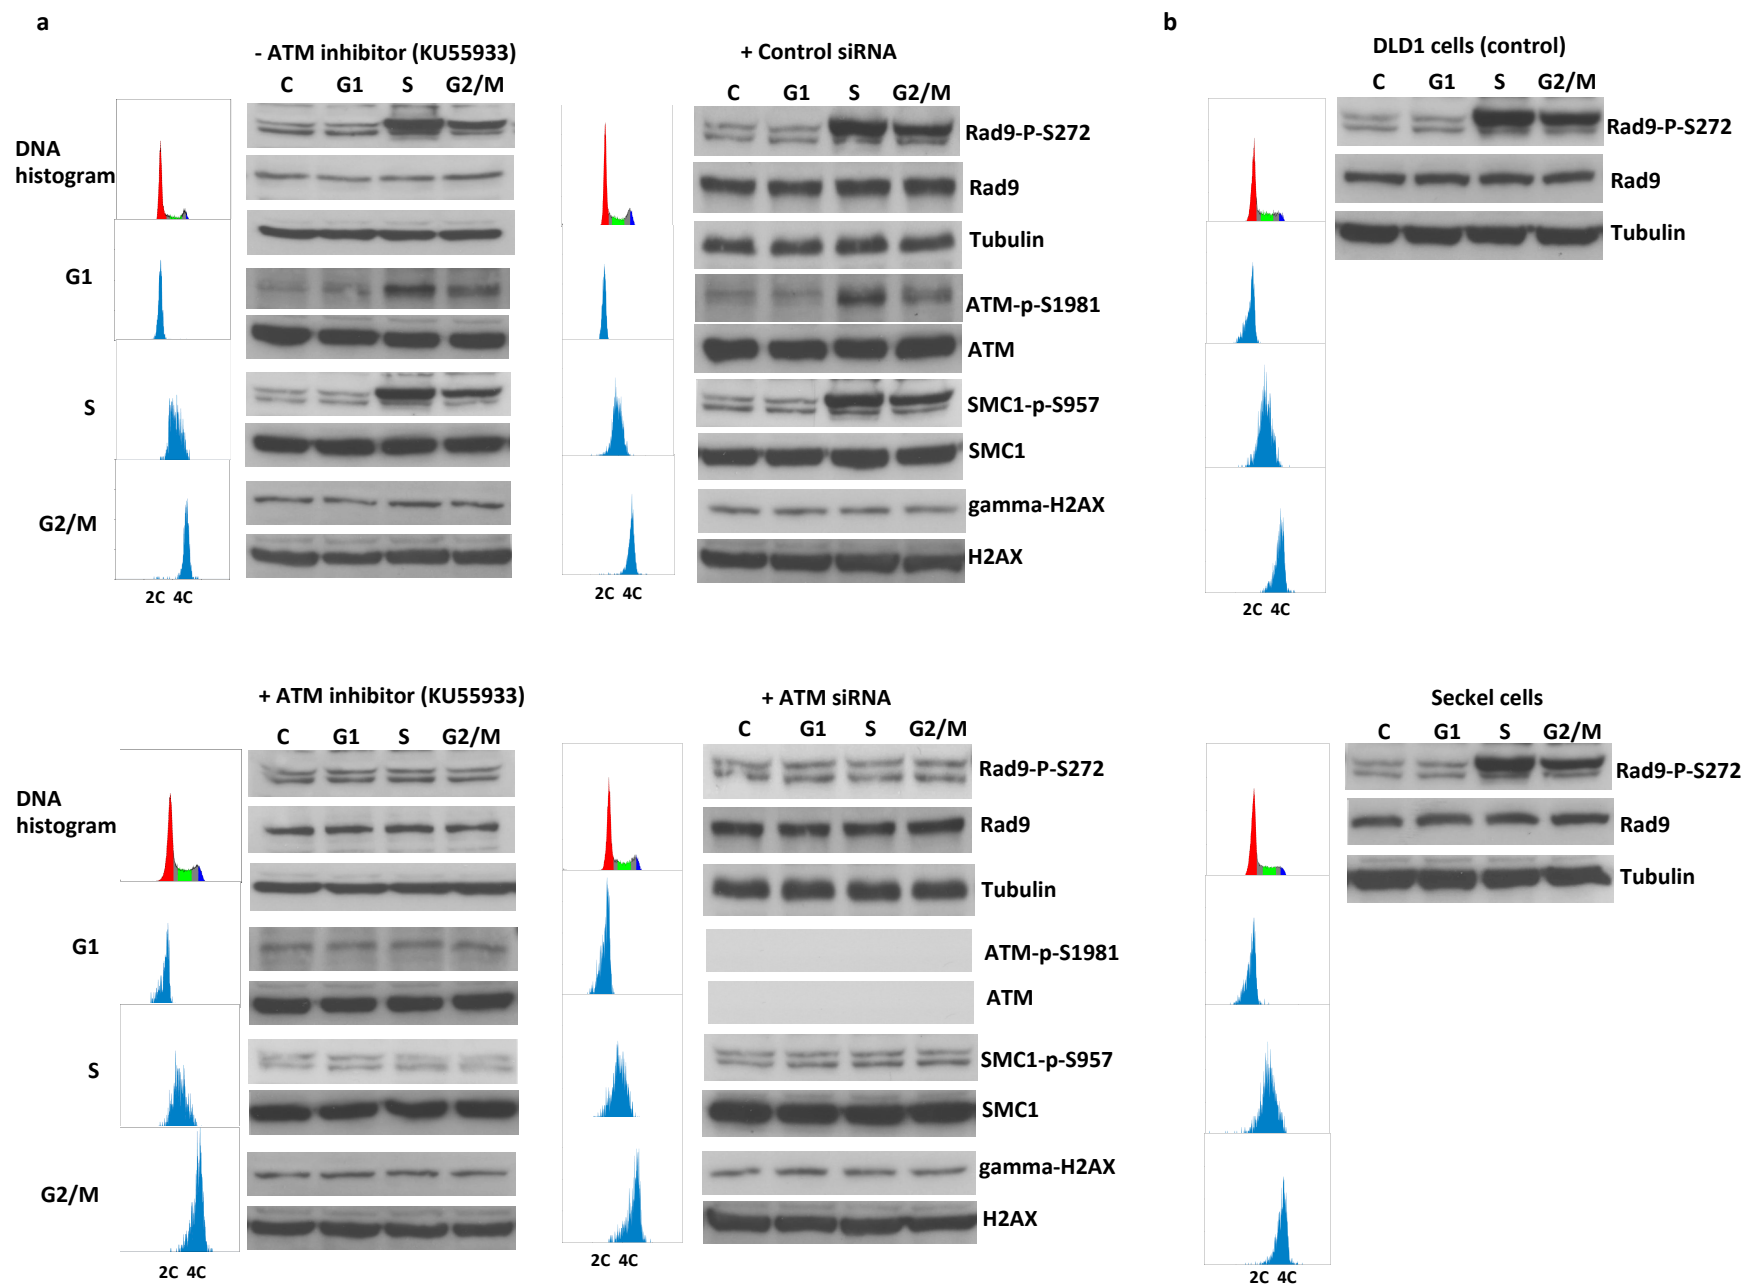

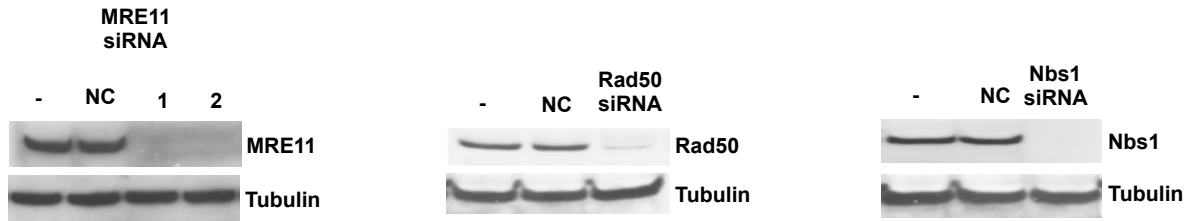

NC: Negative Control

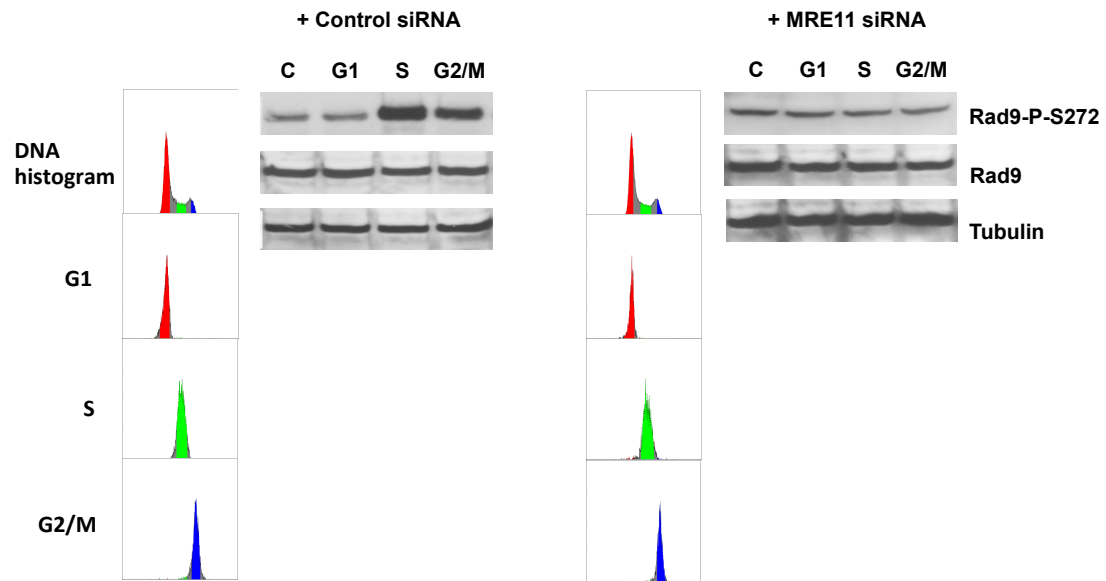

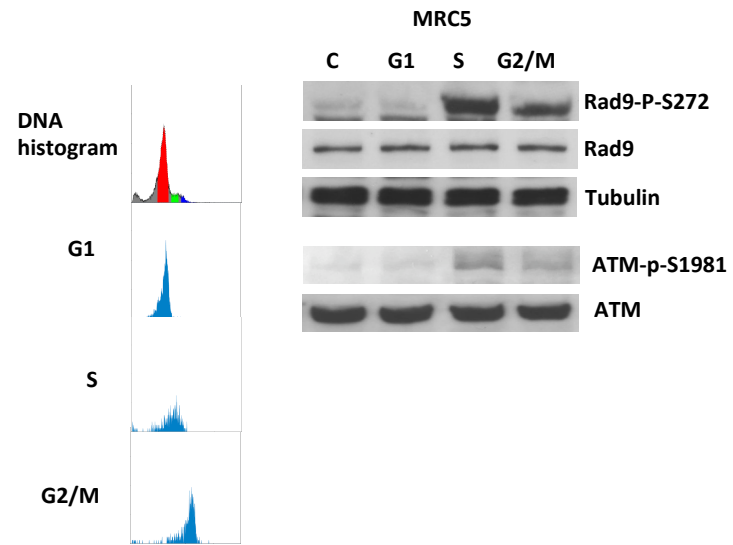

Supplement: cc-11-1796-s01.pdf [file cc-11-1796-s01.pdf]
